## **Short-term acute exposure to wildfire smoke and lung function in a Royal Canadian Mounted Police (RCMP) cohort**

Subhabrata Moitra<sup>1</sup>, Ali Farshchi Tabrizi<sup>1</sup>, Dina Fathy<sup>2</sup>, Samineh Kamravaei<sup>1</sup>, Noushin Miandashti<sup>1</sup>, Linda Henderson<sup>2</sup>, Fadi Khadour<sup>2</sup>, Muhammad T. Naseem<sup>2</sup>, Nicola Murgia<sup>3</sup>, Lyle Melenka<sup>1,2</sup>, Paige Lacy<sup>1†</sup>,

<sup>1</sup>Alberta Respiratory Centre, Department of Medicine, University of Alberta, Edmonton, AB, Canada

<sup>2</sup>Synergy Cardiac & Respiratory Care, Sherwood Park, AB, Canada

<sup>3</sup>Department of Occupational and Environmental Medicine, University of Perugia, Perugia, Italy

**†Correspondence to:** Dr. Paige Lacy, Alberta Respiratory Centre (ARC), Department of Medicine, 559 Heritage Medical Research Centre, University of Alberta, Edmonton, Alberta T6G 2R3  
Tel: 780-492-6085, Email: [placy@ualberta.ca](mailto:placy@ualberta.ca)

### **ORCID IDs:**

Subhabrata Moitra: 0000-0002-9388-425X

Paige Lacy: 0000-0001-8885-6011

This manuscript has an online supplement.

## ABSTRACT

**Rationale:** The increasing incidence of extreme wildfire is becoming a concern for public health. Although long-term exposure to wildfire smoke is associated with respiratory illnesses, reports on the association between short-term occupational exposure to wildfire smoke and lung function remain scarce.

**Methods:** In this cross-sectional study, we analyzed data of 218 Royal Canadian Mounted Police officers (mean age: 38±9 years) deployed at the Fort McMurray wildfire in 2016. Individual exposure to air pollutants was calculated by integrating the duration of exposure with the air quality parameters obtained from the nearest air quality monitoring station during the phase of deployment. Lung function was measured using spirometry and body plethysmography. Association between exposure and lung function was examined using principal component linear regression analysis, adjusting for potential confounders.

**Results:** The participants were predominantly male (71%). Mean forced expiratory volume in 1 second (FEV<sub>1</sub>), and residual volume (RV) were 76.5±5.9 and 80.1±19.5 (% predicted). A marginal association was observed between air pollution and higher RV [ $\beta$ : 1.55; 95%CI: -0.28 to 3.37 per interquartile change of air pollution index], but not with other lung function indices. The association between air pollution index and RV was significantly higher in participants who were screened within the first three months of deployment [2.80; 0.91 to 4.70] than those screened later [-0.28; -2.58 to 2.03], indicating a more acute effect of air pollution on peripheral airways.

**Conclusion:** Acute short-term exposure to wildfire-associated air pollutants may impose subtle but clinically important deleterious respiratory effects, particularly in the peripheral airways.

**Keywords:** Air pollution; lung function; occupational exposure; wildfire

## 1. Introduction

In the past three decades, the number of wildfire events in North America has increased significantly. There have been more than 120 major wildfire events in the United States and Canada between 1990 and 2020, out of which 41 took place in 2020 alone (Government of Canada 2020). Between 2007 and 2017, over 6 million acres of land were burned every year in the US and Canada (The Economist 2017). Rapid penetration of wildland areas for residential and industrial purposes, and climate change are some of the major reasons for the increasing number of wildland fires (Bowman et al. 2017; Radeloff et al. 2018; Spracklen et al. 2009). In May 2016, a major wildfire outbreak took place at Fort McMurray in the northern part of Alberta province in Canada, which led to the largest evacuation in Canadian history of over 80,000 people, and is considered the most expensive natural disaster in Canadian history with insured losses worth \$3.7 billion (Statistics Canada 2016). This wildfire burned an area of 5,890 km<sup>2</sup>, an area greater than the size of Prince Edward Island, and affected approximately 8% of all private households in that region (Statistics Canada 2016).

Wildfires severely impact the environment and human health. Wildfire smoke contains a wide range of gaseous compounds, such as carbon monoxide (CO), various oxides of nitrogen (nitric oxide, NO; nitrogen dioxide, NO<sub>2</sub>; and other oxides, NO<sub>x</sub>) and sulfur (sulfur dioxide, SO<sub>2</sub>; and other oxides, SO<sub>x</sub>), ozone (O<sub>3</sub>), methane (CH<sub>4</sub>), and many other polycyclic aromatic hydrocarbons (PAH), and a particulate matters of varying aerodynamic diameters (PMs) (Jaffe et al. 2008a; Jaffe et al. 2008b; Ontawong et al. 2020; Reid et al. 2019; Vasileva and Moiseenko 2013). A higher emission of CO and CH<sub>4</sub>, and NO<sub>x</sub> during a wildfire event facilitates tropospheric O<sub>3</sub> production (Fiore et al. 2002; Kasischke and Bruhwiler 2002; Vasileva and Moiseenko 2013). The gaseous and particulate matters produced by the wildfire smoke is more complex than what is found in vehicular exhaust, and its complexity also depends on various environmental aspects, such as the landscape of the burn area, seasonal conditions, and nature and phase of combustion (such as flaming and smoldering) (Kim et al. 2018; Kondo et al. 2019). Most importantly, the nature of different chemical production is dependent on weather; for example, generation of PMs in a wildfire smoke is dependent on the condition (dry or wet) of the burning biomass and phase of combustion (Black et al. 2017; Kondo et al. 2019).

Most studies describe PMs as the most important wildfire pollutant to impact human health (Adetona et al. 2016; Black et al. 2017; Cascio 2018; Groot et al. 2019; Kim et al. 2014; Kondo et al. 2019; Reid et al. 2016). Exposure to wildfire-related PMs has been consistently shown to associate with increased inflammatory response and respiratory symptoms (Kondo et al. 2019; Künzli et al. 2006; Lipner et al. 2019; Reid et al. 2016; Stowell et al. 2019; Tse et al. 2015; Vora et al. 2011), emergency room visits and hospitalization (Gan et al. 2017; Liu et al. 2017; Youssouf et al. 2014), and mortality (Reid et al. 2016). While there is consistent evidence of long-term exposure to wildfire smoke and respiratory outcomes, lung function as a result of short-term acute exposure to wildfire smoke, particularly to different wildfire-related pollutants, has not been studied in detail. Understanding the clinical nature of respiratory function resulting from such exposure is important for the diagnosis of acute or chronic respiratory health events. Therefore, we aimed to study the association of lung function in relation to short-term acute exposure to different wildfire-related pollutants in first responder Royal Canadian Mounted Police (RCMP) officers during the Fort McMurray wildfire in 2016.

## **2. Methodologies**

### **2.1. Study design and participants**

In this cross-sectional study, we investigated a cohort of RCMP officers who were deployed for the evacuation and rescue of people during a major wildfire that broke out in 2016 at Fort McMurray, located in the northern part of the province of Alberta in Canada. The officers were referred to Synergy Respiratory and Cardiac Care at Sherwood Park, Alberta, for a complete health assessment after being exposed to the Fort McMurray wildfire. 218 officers attended the clinic with a median (range) interval of 60 (33-627 days) days between their deployment at the wildfire sites and the visit to the clinic.

This study was approved by the Health Research Ethics Board of Alberta (HREBA) and Health Research Ethics Board, University of Alberta and all participants provided signed informed consent forms before taking part in the study.

### **2.2. Demographic, job, and health-related information**

An interviewer-administered structured questionnaire was used to capture information about demographic profile (age, sex, smoking history, and frequency of smoking), and personal and family history (exposure to smoke at childhood, and parental lung disease). Details of the questionnaire have been described elsewhere (Moitra et al. 2020). Additionally, job-exposure information including the dates and duration of deployment at the wildfire sites and use of respiratory protection (yes/no) were also recorded. Asthma was either self-reported or previously diagnosed by a physician or diagnosed at the clinic as per the guidelines (GINA 2016).

### 2.3. Exposure assessment

Information about the air quality indices associated with the Fort McMurray wildfire were obtained from the Athabasca valley air monitoring station, the nearest air quality monitoring station where the officers were deployed. The Athabasca valley air monitoring station continuously (hourly) measures several indices of air quality along with weather conditions such as air temperature, relative humidity, wind speed and direction, and barometric pressure. Details of the instrumentation and measurement procedures are available elsewhere (WBEA 2020). As the officers were deployed at wildfire sites in different time points between May 01 and May 31, we accessed the air quality data from May 01 until May 31, 2016. Daily concentrations of CO, CH<sub>4</sub>, NO, NO<sub>2</sub>, O<sub>3</sub>, SO<sub>2</sub>, and particulate matter with aerodynamic diameter  $\leq 2.5\mu\text{m}$  (PM<sub>2.5</sub>) were considered as the main air pollutants.

We then we calculated individual exposure to each of the air pollutants according to the formula developed previously (Rappaport 1991), which can be expressed mathematically as the following:

$$E = \int_{t1}^{t2} C(t) dt$$

Where,  $E$  is the total exposure to each of the pollutants;  $C$  is the concentration of the pollutant in the air between the first day ( $t1$ ) and last day ( $t2$ ) of deployment; and  $t$  is the exposure duration (number of days spent at the wildfire sites).

### 2.4. Lung Function

A complete lung function profiling was performed for each of the officers. Spirometry and body plethysmography were performed using a Vmax™ Encore pulmonary function test system (Vyaire Medical, Mettawa, IL) according to the American Thoracic Society/European Respiratory Society

(ATS/ERS) guidelines for spirometry (Miller et al. 2005), and body plethysmography (Wanger et al. 2005). Forced expiratory volume in 1 second ( $FEV_1$ ), forced vital capacity (FVC), and ratio of  $FEV_1$  and FVC ( $FEV_1/FVC$ ) were considered for this study. Percent of predicted values of these indices were calculated from the Canadian Cohort of Obstructive Lung Diseases (CanCOLD) reference equations of spirometry (Tan et al. 2011). Total lung capacity (TLC), residual volume (RV) and their ratio (RV/TLC) were considered as the main plethysmographic indices. Percent of predicted values for plethysmographic indices were calculated from previously established reference equations for the Canadian population (Gutierrez et al. 2004). COPD was confirmed if the post-bronchodilator  $FEV_1/FVC$  was lower than 0.7 (Vestbo et al. 2013).

## 2.5. Statistical analyses

Variables were presented as mean (standard deviation, SD) or median (IQR) for continuous variables, and frequency (%) for categorical variables. At first, we analysed the relationships between the exposure variables (individual exposure to the studied air pollutants) using Spearman's rank order correlation as the variables were non-normally distributed. Secondly, we checked for collinearity between the air pollutant variables using variance inflation factor (VIF). As the variables were highly correlated (Spearman's  $\rho$  range: 0.62 to 0.98; all  $p$  value  $<0.001$ ) (**Figure 1**) and demonstrated very high collinearity (mean VIF = 158.7), we used a dimension reduction technique (principal component analysis, PCA) with a varimax rotation. Based on Eigenvalue  $> 1.0$  (**Table S1 and Figure S1**), one principal component (PC1) was retained that explained 88% of the variance (**Figure S2**). We have used the term 'air pollution index' for the principal component (PC1) in all subsequent analyses and in further text.

- **Figure 1**

To study the association between the air pollution index and lung function, we created a univariable (unadjusted) and a multivariable linear regression model for each of the lung function variables, taking into account potential confounders. Age, sex, body mass index (BMI), race (Caucasian vs. others), smoking history (never vs. ever smoker), and interval (days between deployment and screening) were tested as potential confounders and added into the multivariate models in a step-forward and

backward approach and retained in the model (i) either based on an *a priori* evidence, or (ii) if the covariate influenced the estimates of the remaining variables by more than 10%. Heteroskedasticity of the models was checked using the Cook-Weisberg's test (Cook and Weisberg 1983). Goodness of fit of the models was assessed using the Akaike's information criteria (AIC) (Salkind 2011).

In addition to that, we also performed several secondary analyses. Firstly, we adjusted the multivariate models additionally for the use of personal protective equipment (PPE). Secondly, we stratified the multivariable models by interval ( $\leq 90$  days and  $>90$  days) and the estimates were compared using Chow test (Chow 1960). Lastly, we tested potential effect modification by smoking (never vs. ever smoker), presence of a diagnosed airway disease (asthma or COPD), exposure to second-hand smoke at childhood, and parental lung disease. All analyses were performed using a complete case approach in Stata V.15.1 (StataCorp, College Station, Texas, USA). An alpha level of 0.05 was considered as the threshold for statistical significance.

### 3. Results

#### 3.1. Study population characteristics and air pollution exposure

Of those screened, most participants were Caucasian (96%) and male (71%) with a mean age of 38 (standard deviation, SD: 9) years (**Table 1**). 81% were never-smokers. Median exposure duration of the participants was 8 (interquartile range, IQR: 7, 10) days. Participants were exposed to a very high amount of carboniferous compounds (such as CO and CH<sub>4</sub>) (ranging between 9680 and 25945  $\mu\text{g}/\text{m}^3$ ) in addition to a high amount of exposure to O<sub>3</sub>, and PM<sub>2.5</sub> during the entire period of deployment. Mean (SD) FEV<sub>1</sub> (% predicted), RV (% predicted), and RV/TLC of the participants were 96.2 (12.4), 80.1 (19.5), and 22.4 (4.8), respectively.

- **Table 1**

#### 3.2. Association between air pollution and lung function

In the unadjusted models, we did not observe any significant association between the air pollution index and spirometric lung function variables (FVC, FEV<sub>1</sub>, and FEV<sub>1</sub>/FVC). However, we observed that air pollution index was marginally associated with peripheral airway dysfunction as measured by

plethysmography, i.e., an IQR increment of air pollution index was associated with an increase in RV (% predicted) ( $\beta$ : 1.76; 95% confidence interval [CI]: -0.06 to 3.57) and RV/TLC (0.40; -0.05 to 0.85) (**Figure 2**). In multivariable models adjusted for potential confounders, although the magnitude of the estimates was minimised, the directionality of the associations remained unchanged. Upon further adjusting the multivariable models by the use of PPE, we did not observe any change in the estimates of both spirometric and plethysmographic lung function variables (**Table S2**).

- **Figure 2**

However, after stratifying the associations by a specific interval ( $\leq 90$  days and  $>90$  days), we found that there was a significant adverse effect of air pollution on RV and RV/TLC among participants who were screened  $\leq 90$  days compared with those screened  $>90$  days of deployment (**Figure 3**). For example, we observed a 2.8% increase in RV (95%CI: 0.91 to 4.70;  $P < 0.01$ ) and 0.59% increase in RV/TLC per IQR increment of air pollution index in the first group, whereas no such effect was observed in the latter group. Despite these changes, acute effects of air pollution were not observed for spirometric lung volumes. We did not observe any effect modification by smoking, presence of any prior airway obstruction due to existing illness (asthma and COPD), exposure to second-hand smoke at childhood, or any parental history of lung disease (**Table S3**).

- **Figure 3**

#### 4. Discussion

In this study, we found RCMP officers deployed during the 2016 Fort McMurray wildfires were exposed to an exceptionally high level of wildfire-related air pollutants (primarily to CO, CH<sub>4</sub>, NO<sub>2</sub>, O<sub>3</sub>, and PM<sub>2.5</sub>) over a short period of time. In our analysis, although short-term acute exposure to wildfire-related air pollutants (denoted as ‘air pollution index’ in the text) was not associated with spirometric lung function (FEV<sub>1</sub>, FVC, FEV<sub>1</sub>/FVC), we observed a marginal association with small airway functions as observed in plethysmographic recording. A higher association between air pollution index and small airway (indicated by higher RV and RV/TLC) was observed in those participants who were screened within the first 90 days of deployment. However, no such association was found in those



who were screened later (90 days post deployment). We did not observe any effect modification by smoking, any pre-existing airway obstruction due to asthma or COPD, childhood smoke exposure, or any parental history of lung disease.

We did not test the association between each of the air pollutants and lung function separately; nevertheless, our data suggest that the participants were primarily exposed to exceptionally high concentrations of a mixture of different air pollutants that appeared to have a combined effect on small airway function. Although literature on the effect of CO on lung function is scarce, some studies have demonstrated lung function decline in association with environmental exposure to CO, particularly in children (Dashdendev et al. 2011) and asthmatics (Canova et al. 2009). Another recent study demonstrated that kitchen stoves using liquefied petroleum gas (LPG) also emit CO, which is associated with lower lung function (Singh et al. 2017). Moreover, the effect of CO may be more profound in the presence of high levels of carbon dioxide (CO<sub>2</sub>), although the concentration of CO<sub>2</sub> at wildfire sites could not be obtained. Participants in our study were also exposed to very high amounts of CH<sub>4</sub>. Although methane-induced respiratory problems are not well studied, one case report suggested that CH<sub>4</sub> inhalation was associated with acute pneumonitis (Jo et al. 2013). Despite some epidemiological evidence for CH<sub>4</sub> exposure-associated respiratory conditions (Ngajilo 2014; Yu et al. 2018), how this molecule affects the lung physiology is not well understood. Although an independent assessment between CH<sub>4</sub> and lung function is not practically feasible in this study, we may postulate based on previous literature that CH<sub>4</sub> may affect lung function in the presence of other pollutants and oxidizing agents, such as O<sub>3</sub>.

The effect of O<sub>3</sub> on lung function has been studied extensively (Chen et al. 2015; Frank et al. 2001; Tager et al. 2005; Weinmann et al. 1995; Zhang et al. 2019). It is evident that higher exposure to O<sub>3</sub> is associated with reduced small airway function (Frank et al. 2001; Tager et al. 2005; Weinmann et al. 1995), and this mechanism is mediated by neutrophilic inflammation as well as other pro-inflammatory responses in the distal airways, which serve to increase airway resistance in the peripheral lungs (Bhalla 1999; Weinmann et al. 1995). All these previous reports support our findings of lowered small airway function in association with exposure to air pollutants.

NO<sub>2</sub> and PM<sub>2.5</sub> are generated during combustion of biomass and fossil fuels and are considered as the most important air pollutants to cause respiratory damage. The damaging effects of NO<sub>2</sub> on small airway function was first established more than 40 years ago. Inhalation of NO<sub>2</sub> may induce bronchiolitis obliterans, a typical feature of small airway damage (Fleming et al. 1979). Such manifestations might develop within 2 weeks of exposure, but recover over time (Fleming et al. 1979). This further supports our observation of elevated small airway obstruction in those who were screened early after exposure. Several other studies have reinforced evidence of the injurious effects of NO<sub>2</sub> on lung function, particularly on small airways (Gong et al. 2008; Havet et al. 2020). However, it has been noted that NO<sub>2</sub> and PM<sub>2.5</sub> usually coexist, and the effect of NO<sub>2</sub> on the lungs is enhanced by PM<sub>2.5</sub> (Gong et al. 2008). PM<sub>2.5</sub> contain ultrafine particles that can easily penetrate the distal parts of the lungs, deposit in the alveoli, and can also cross the blood-gas barrier (Churg and Brauer 2000). Studies have revealed that exposure to ultrafine particulate matter may elicit acute lung function changes, particularly in the small airways (Yang et al. 2020). Our observation of small airway changes in association with a synergistic effect of PM<sub>2.5</sub> and other hazardous gases is also substantiated by other studies describing the impact of PM<sub>2.5</sub> on small airway function (Cui et al. 2020; Gong et al. 2008). Although we did not study underlying mechanisms, we assume that these air pollutants induce acute inflammation in the distal airways and enhance structural changes in these areas (Zheng et al. 2018). However, these changes are often subtle and are not easily detected by spirometry.

Our findings provide a clinical insight into respiratory health effects associated with short-term acute exposure to air pollutants. The results endorse the use of high-sensitivity lung function tests such as body plethysmography and potentially oscillometry over spirometry for the detection of subtle yet clinically important changes in the lungs due to exposure to air pollutants, which may not be detected in spirometry. We also vouch for adequate respiratory protection for first responders involved in fire control and are likely to be exposed to very high levels of gaseous and particulate matters. Moreover, we found a very high prevalence of asthma among the officers than the average Canadian population (Statistics Canada 2020). Although we could not diagnose any events of work-related asthma in our participants, the alarmingly higher prevalence of asthma among the participants than the average Canadian population underscores plausible work-related exposures, which may be responsible for respiratory illnesses. Therefore, our study reinstates the need for a holistic assessment of

occupational and environmental exposure along with state-of-the-art clinical investigations for a comprehensive diagnosis of the health conditions. Lastly, proper monitoring and surveillance for any potential workplace exposures is strongly recommended.

Our study offers several new information to the existing knowledge of wildfire smoke exposure and respiratory health effects. To the best of our knowledge, this is the first study to demonstrate an association between a short-term acute exposure to wildfire smoke and small airway function. Secondly, unlike other wildfire-related studies that have mostly focused on particulate matter, we considered both particulate and gaseous pollutants that enabled us to estimate the cumulative effects of all the pollutants. Lastly, while other studies use only spirometry for lung function measurement, we used both spirometry and body plethysmography for a more comprehensive assessment of respiratory health of the participants.

However, our study has some limitations. This is a cross-sectional study; therefore, a causal relationship between exposure to air pollutants and lung function changes cannot be established, although our results are in line with previously established epidemiological evidence and plausible biological effects of air pollution on lung function changes. Secondly, the study was not designed in a prospective manner and was a result of an unplanned health surveillance program followed by a natural disaster, the participants were not recruited through proper inclusion-exclusion criteria. Therefore, we had a relatively smaller sample size than many other properly designed epidemiological studies of this nature; thus an inadequate statistical power could be another limitation of this study. Thirdly, we could not perform any hematological or immunological profiling, which could delineate any underlying acute or chronic inflammation. Fourthly, although we calculated individual exposure to air pollutants indirectly, a direct approach, i.e., by using a personal air sampler, would more accurately measure exposures and specific deployment sites of participants. Lastly, we did not measure airway resistance, which would be provide us with more clinically important information about any structural changes in the peripheral airways.

## **5. Conclusion**

We found that short-term acute exposure to wildfire-related air pollutants were marginally associated with lowered small airway function, and that these subtle changes were not reflected in spirometry. Our results also suggest that such short-term exposure may cause acute changes in lung function, which needs to be detected at an early stage. To the best of our knowledge, this is the first study to investigate small airway function due to a short-term acute wildfire-related smoke exposure, taking into consideration a wide range of gaseous and particulate matters. Our results provide further substantiate previously published findings linking air pollution with lung function changes, particularly, with small airways, and call for more advanced approaches for an early diagnosis of respiratory conditions.

#### **CRedit authorship contribution statement**

**Subhabrata Moitra:** Formal analysis, Software, Validation, Visualization, Writing - original draft, Writing - review & editing. **Ali Farshchi Tabrizi:** Data curation, Software, Writing - review & editing. **Dina Fathy:** Data curation, Software, Writing - review & editing. **Samineh Kamravaei:** Methodology, Software, Writing - review & editing. **Noushin Miandashti:** Methodology, Software, Writing - review & editing. **Linda Henderson:** Project administration, Writing - review & editing. **Fadi Khadour:** Investigation, Project administration, Resources, Writing - review & editing. **Muhammad T Naseem:** Investigation, Project administration, Resources, Writing - review & editing. **Nicola Murgia:** Validation, Writing – review & editing. **Lyle Melenka:** Conceptualization, Funding acquisition, Investigation, Project administration, Resources. **Paige Lacy:** Project administration, Resources, Supervision, Writing - review & editing.

#### **Funding and acknowledgement**

The study was supported by an unrestricted research grant from Synergy Respiratory Care Ltd. We would like to thank all the volunteer RCMP officers contributing to the study as well as members of our group and Synergy Respiratory and Cardiac Care for their support of this study: Kawtar Idrissi Machichi, Bill Stowe, Carrie McPhee, Jennifer Spring, Melanie De Pruis, Lindsay Simmonds, Celeste Hernandez, Blake MacDonald, Linda Ferguson, Michael Krause, Heather Ryan, Michele McKim, Kylie Haydey, Shirley Carr, William Spring, and Melanie Holowach. We would also like to thank Meghan Dueck and Lei Pei for their support in data management.

### **Conflict of interest**

Subhabrata Moitra reports personal fees from Elsevier Inc. and Synergy Respiratory & Cardiac Care, outside the submitted work. Linda Henderson reports personal fees from Wellness of Workers (WoW) Program, Local 110 Heat & Frost Insulators & Allied Workers, and Synergy Respiratory Care Limited, outside the submitted work. Fadi Khadour, Muhammad T. Naseem, and Lyle Melenka report grants from the Wellness of Workers (WoW) Program, Local 110 Heat & Frost Insulators & Allied Workers outside the submitted work. Nicola Murgia reports non-financial support from GlaxoSmithKline (GSK, Italy), personal fees and non-financial support from Chiesi (Parma, Italy), personal fees and non-financial support from Menarini (Florence, Italy), personal fees and non-financial support from AstraZeneca, non-financial support from Alk-Abello (Hørsholm, Denmark), outside of this submitted work. Paige Lacy reports grants from Wellness of Workers (WoW) Program, Local 110 Heat & Frost Insulators & Allied Workers, and Synergy Respiratory Care Limited, and personal fees from AstraZeneca and GlaxoSmithKline (GSK, Canada), outside the submitted work. Other authors do not have any conflict of interest to declare.

### **Data Sharing Policy**

Data of this manuscript may contain sensitive personal information, and share, transfer, or modification of the data is prohibited by law. However, an anonymous dataset with limited information can be shared upon reasonable request made to the corresponding author.

### **References**

- Adetona, O., Reinhardt, T.E., Domitrovich, J., Broyles, G., Adetona, A.M., Kleinman, M.T., . . . Naeher, L.P., 2016. Review of the health effects of wildland fire smoke on wildland firefighters and the public. *Inhal. Toxicol.*, 28, 95-139. <https://doi.org/10.3109/08958378.2016.1145771>
- Bhalla, D.K., 1999. Ozone-Induced Lung Inflammation and Mucosal Barrier Disruption: Toxicology, Mechanisms, and Implications. *Journal of Toxicology and Environmental Health, Part B*. 2, 31-86. <https://doi.org/10.1080/109374099281232>

- Black, C., Tesfaigzi, Y., Bassein, J.A., Miller, L.A., 2017. Wildfire smoke exposure and human health: Significant gaps in research for a growing public health issue. *Environ. Toxicol. Pharmacol.*, 55, 186-195. <https://doi.org/10.1016/j.etap.2017.08.022>
- Bowman, D.M.J.S., Williamson, G.J., Abatzoglou, J.T., Kolden, C.A., Cochrane, M.A., Smith, A.M.S., 2017. Human exposure and sensitivity to globally extreme wildfire events. *Nature Ecology & Evolution*. 1 <https://doi.org/10.1038/s41559-016-0058>
- Canova, C., Torresan, S., Simonato, L., Scapellato, M.L., Tessari, R., Visentin, A., . . . Maestrelli, P., 2009. Carbon monoxide pollution is associated with decreased lung function in asthmatic adults. *Eur. Respir. J.*, 35, 266-272. <https://doi.org/10.1183/09031936.00043709>
- Cascio, W.E., 2018. Wildland fire smoke and human health. *Science of The Total Environment*. 624, 586-595. <https://doi.org/10.1016/j.scitotenv.2017.12.086>
- Chen, C.-H., Chan, C.-C., Chen, B.-Y., Cheng, T.-J., Leon Guo, Y., 2015. Effects of particulate air pollution and ozone on lung function in non-asthmatic children. *Environ. Res.*, 137, 40-48. <https://doi.org/10.1016/j.envres.2014.11.021>
- Chow, G.C., 1960. Tests of Equality Between Sets of Coefficients in Two Linear Regressions. *Econometrica*. 28, 591. <https://doi.org/10.2307/1910133>
- Churg, A., Brauer, M., 2000. Ambient atmospheric particles in the airways of human lungs. *Ultrastructural Pathology*. 24, 353-361. <https://doi.org/10.1080/019131200750060014>
- Cook, R.D., Weisberg, S., 1983. Diagnostics for heteroscedasticity in regression. *Biometrika*. 70, 1-10. <https://doi.org/10.1093/biomet/70.1.1>
- Cui, X., Li, Z., Teng, Y., Barkjohn, K.K., Norris, C.L., Fang, L., . . . Zhang, J., 2020. Association Between Bedroom Particulate Matter Filtration and Changes in Airway Pathophysiology in Children With Asthma. *JAMA Pediatrics*. 174, 533. <https://doi.org/10.1001/jamapediatrics.2020.0140>
- Dashdende, B., Fukushima, L.K., Woo, M.S., Ganbaatar, E., Warburton, D., 2011. Carbon monoxide pollution and lung function in urban compared with rural Mongolian children. *Respirology*. 16, 653-658. <https://doi.org/10.1111/j.1440-1843.2011.01958.x>
- Fiore, A.M., Jacob, D.J., Field, B.D., Streets, D.G., Fernandes, S.D., Jang, C., 2002. Linking ozone pollution and climate change: The case for controlling methane. *Geophys. Res. Lett.*, 29, 25-21-25-24. <https://doi.org/10.1029/2002gl015601>

- Fleming, G.M., Chester, E.H., Montenegro, H.D., 1979. Dysfunction of Small Airways following Pulmonary Injury due to Nitrogen Dioxide. *Chest*. 75,720-721. <https://doi.org/10.1378/chest.75.6.720>
- Frank, R., Liu, M., Spannhake, E., Mlynarek, S., Macri, K., Weinmann, G., 2001. Repetitive ozone exposure of young adults: evidence of persistent small airway dysfunction. *Am. J. Respir. Crit. Care Med.*, 164,1253-1260. <https://doi.org/10.1164/ajrccm.164.7.2010043>
- Gan, R.W., Ford, B., Lassman, W., Pfister, G., Vaidyanathan, A., Fischer, E., . . . Magzamen, S., 2017. Comparison of wildfire smoke estimation methods and associations with cardiopulmonary-related hospital admissions. *GeoHealth*. 1,122-136. <https://doi.org/10.1002/2017gh000073>
- GINA, 2016. Global Strategy for Asthma Management and Prevention Global Initiative for Asthma. National Heart, Lung and Blood Institute, Bethesda, MD, USA
- Gong, H., Jr., Linn, W.S., Clark, K.W., Anderson, K.R., Geller, M.D., Sioutas, C., 2008. Respiratory Responses to Exposures With Fine Particulates and Nitrogen Dioxide in the Elderly With and Without COPD. *Inhal. Toxicol.*, 17,123-132. <https://doi.org/10.1080/08958370590904481>
- Government of Canada, 2020. National Wildland Fire Situation Report. <https://cwfis.cfs.nrcan.gc.ca/report> (accessed 27 November 2020).
- Groot, E., Caturay, A., Khan, Y., Copes, R., 2019. A systematic review of the health impacts of occupational exposure to wildland fires. *Int. J. Occup. Med. Environ. Health*. 32,121-140. <https://doi.org/10.13075/ijomeh.1896.01326>
- Gutierrez, C., Ghezzi, R.H., Abboud, R.T., Cosio, M.G., Dill, J.R., Martin, R.R., . . . Zamel, N., 2004. Reference values of pulmonary function tests for Canadian Caucasians. *Can. Respir. J.*, 11,414-424. <https://doi.org/10.1155/2004/857476>
- Havet, A., Hulo, S., Cuny, D., Riant, M., Occelli, F., Cherot-Kornobis, N., . . . Dauchet, L., 2020. Residential exposure to outdoor air pollution and adult lung function, with focus on small airway obstruction. *Environ. Res.*, 183,109161. <https://doi.org/10.1016/j.envres.2020.109161>
- Jaffe, D., Chand, D., Hafner, W., Westerling, A., Spracklen, D., 2008a. Influence of Fires on O<sub>3</sub> Concentrations in the Western U.S. *Environ. Sci. Technol.*, 42,5885-5891. <https://doi.org/10.1021/es800084k>
- Jaffe, D., Hafner, W., Chand, D., Westerling, A., Spracklen, D., 2008b. Interannual Variations in PM<sub>2.5</sub> due to Wildfires in the Western United States. *Environ. Sci. Technol.*, 42,2812-2818. <https://doi.org/10.1021/es702755v>

- Jo, J.Y.,Kwon, Y.S.,Lee, J.W.,Park, J.S.,Rho, B.H.,Choi, W.-I., 2013. Acute Respiratory Distress Due to Methane Inhalation. *Tuberculosis and Respiratory Diseases.* 74,120. <https://doi.org/10.4046/trd.2013.74.3.120>
- Kasischke, E.S.,Bruhwiler, L.P., 2002. Emissions of carbon dioxide, carbon monoxide, and methane from boreal forest fires in 1998. *J. Geophys. Res.*, 108<https://doi.org/10.1029/2001jd000461>
- Kim, Y.H.,Tong, H.,Daniels, M.,Boykin, E.,Krantz, Q.T.,McGee, J., . . . Gilmour, M.I., 2014. Cardiopulmonary toxicity of peat wildfire particulate matter and the predictive utility of precision cut lung slices. *Part. Fibre Toxicol.*, 11,29. <https://doi.org/10.1186/1743-8977-11-29>
- Kim, Y.H.,Warren, S.H.,Krantz, Q.T.,King, C.,Jaskot, R.,Preston, W.T., . . . Gilmour, M.I., 2018. Mutagenicity and Lung Toxicity of Smoldering vs. Flaming Emissions from Various Biomass Fuels: Implications for Health Effects from Wildland Fires. *Environ. Health Perspect.*, 126,017011. <https://doi.org/10.1289/ehp2200>
- Kondo, M.,De Roos, A.,White, L.,Heilman, W.,Mockrin, M.,Gross-Davis, C.,Burstyn, I., 2019. Meta-Analysis of Heterogeneity in the Effects of Wildfire Smoke Exposure on Respiratory Health in North America. *Int. J. Environ. Res. Public Health.* 16,960. <https://doi.org/10.3390/ijerph16060960>
- Künzli, N.,Avol, E.,Wu, J.,Gauderman, W.J.,Rappaport, E.,Millstein, J., . . . Peters, J.M., 2006. Health effects of the 2003 Southern California wildfires on children. *American journal of respiratory and critical care medicine.* 174,1221-1228. <https://doi.org/10.1164/rccm.200604-519OC>
- Lipner, E.M.,O'Dell, K.,Brey, S.J.,Ford, B.,Pierce, J.R.,Fischer, E.V.,Crooks, J.L., 2019. The Associations Between Clinical Respiratory Outcomes and Ambient Wildfire Smoke Exposure Among Pediatric Asthma Patients at National Jewish Health, 2012-2015. *GeoHealth.* 3,146-159. <https://doi.org/10.1029/2018gh000142>
- Liu, J.C.,Wilson, A.,Mickley, L.J.,Dominici, F.,Ebisu, K.,Wang, Y., . . . Bell, M.L., 2017. Wildfire-specific Fine Particulate Matter and Risk of Hospital Admissions in Urban and Rural Counties. *Epidemiology (Cambridge, Mass.)*. 28,77-85. <https://doi.org/10.1097/ede.0000000000000556>
- Miller, M.R.,Hankinson, J.,Brusasco, V.,Burgos, F.,Casaburi, R.,Coates, A., . . . Force, A.E.T., 2005. Standardisation of spirometry. *Eur. Respir. J.*, 26,319-338. <https://doi.org/10.1183/09031936.05.00034805>
- Ngajilo, D., 2014. Respiratory health effects in poultry workers. *Current Allergy and Clinical Immunology* 27,116-124. <https://doi.org/>



Ontawong, A., Saokaew, S., Jamroendararasame, B., Duangjai, A., 2020. Impact of long-term exposure wildfire smog on respiratory health outcomes. *Expert Rev. Respir. Med.*, 14,527-531.

<https://doi.org/10.1080/17476348.2020.1740089>

Radeloff, V.C., Helmers, D.P., Kramer, H.A., Mockrin, M.H., Alexandre, P.M., Bar-Massada, A., . . .

Stewart, S.I., 2018. Rapid growth of the US wildland-urban interface raises wildfire risk. *Proceedings of the National Academy of Sciences*. 115,3314-3319. <https://doi.org/10.1073/pnas.1718850115>

Rappaport, S.M., 1991. Selection of the Measures of Exposure for Epidemiology Studies. *Appl. Occup. Environ. Hyg.*, 6,448-457. <https://doi.org/10.1080/1047322X.1991.10387912>

Reid, C.E., Brauer, M., Johnston, F.H., Jerrett, M., Balmes, J.R., Elliott, C.T., 2016. Critical Review of Health Impacts of Wildfire Smoke Exposure. *Environ. Health Perspect.*, 124,1334-1343.

<https://doi.org/10.1289/ehp.1409277>

Reid, C.E., Considine, E.M., Watson, G.L., Telesca, D., Pfister, G.G., Jerrett, M., 2019. Associations between respiratory health and ozone and fine particulate matter during a wildfire event. *Environ. Int.*, 129,291-298. <https://doi.org/10.1016/j.envint.2019.04.033>

<https://doi.org/10.1016/j.envint.2019.04.033>

Salkind, N.J. ed. Akaike Information Criterion. Thousand Oaks, USA: Sage Publications, Inc.; 2011

Singh, A., Kesavachandran, C.N., Kamal, R., Bihari, V., Ansari, A., Azeez, P.A., . . . Khan, A.H., 2017. Indoor air pollution and its association with poor lung function, microalbuminuria and variations in blood pressure among kitchen workers in India: a cross-sectional study. *Environ. Health*.

16 <https://doi.org/10.1186/s12940-017-0243-3>

Spracklen, D.V., Mickley, L.J., Logan, J.A., Hudman, R.C., Yevich, R., Flannigan, M.D., Westerling, A.L., 2009. Impacts of climate change from 2000 to 2050 on wildfire activity and carbonaceous aerosol concentrations in the western United States. *J. Geophys. Res.*,

114 <https://doi.org/10.1029/2008jd010966>

Statistics Canada, 2016. Fort McMurray 2016 Wildfire - Economic Impact. <https://www150.statcan.gc.ca/n1/en/pub/11-627-m/11-627-m2017007-eng.pdf> (accessed November 27 2020).

27 2020).

Statistics Canada, 2020. Table 13-10-0096-08 Asthma, by age group.

<https://www150.statcan.gc.ca/t1/tbl1/en/tv.action?pid=1310009608> (accessed November 27 2020).

- Stowell, J.D., Geng, G., Saikawa, E., Chang, H.H., Fu, J., Yang, C.-E., . . . Strickland, M.J., 2019. Associations of wildfire smoke PM<sub>2.5</sub> exposure with cardiorespiratory events in Colorado 2011–2014. *Environ. Int.*, 133, 105151. <https://doi.org/10.1016/j.envint.2019.105151>
- Tager, I.B., Balmes, J., Lurmann, F., Ngo, L., Alcorn, S., K?nzli, N., 2005. Chronic Exposure to Ambient Ozone and Lung Function in Young Adults. *Epidemiology (Cambridge, Mass.)*. 16, 751-759. <https://doi.org/10.1097/01.ede.0000183166.68809.b0>
- Tan, W.C., Bourbeau, J., Hernandez, P., Chapman, K., Cowie, R., FitzGerald, M.J., . . . investigators, L.s., 2011. Canadian prediction equations of spirometric lung function for Caucasian adults 20 to 90 years of age: results from the Canadian Obstructive Lung Disease (COLD) study and the Lung Health Canadian Environment (LHCE) study. *Can. Respir. J.*, 18, 321-326. <https://doi.org/10.1155/2011/540396>
- The Economist, 2017. Why the North American west is on fire. <https://www.economist.com/the-economist-explains/2017/10/13/why-the-north-american-west-is-on-fire> (accessed November 27 2020).
- Tse, K., Chen, L., Tse, M., Zuraw, B., Christiansen, S., 2015. Effect of catastrophic wildfires on asthmatic outcomes in obese children: breathing fire. *Annals of allergy, asthma & immunology : official publication of the American College of Allergy, Asthma, & Immunology*. 114, 308-311.e304. <https://doi.org/10.1016/j.anai.2015.01.018>
- Vasileva, A., Moiseenko, K., 2013. Methane emissions from 2000 to 2011 wildfires in Northeast Eurasia estimated with MODIS burned area data. *Atmos. Environ.*, 71, 115-121. <https://doi.org/10.1016/j.atmosenv.2013.02.001>
- Vestbo, J., Hurd, S.S., Agustí, A.G., Jones, P.W., Vogelmeier, C., Anzueto, A., . . . Rodriguez-Roisin, R., 2013. Global strategy for the diagnosis, management, and prevention of chronic obstructive pulmonary disease: GOLD executive summary. *American journal of respiratory and critical care medicine*. 187, 347-365. <https://doi.org/10.1164/rccm.201204-0596PP>
- Vora, C., Renvall, M.J., Chao, P., Ferguson, P., Ramsdell, J.W., 2011. 2007 San Diego wildfires and asthmatics. *The Journal of asthma : official journal of the Association for the Care of Asthma*. 48, 75-78. <https://doi.org/10.3109/02770903.2010.535885>

- Wanger, J., Clausen, J.L., Coates, A., Pedersen, O.F., Brusasco, V., Burgos, F., . . . Viegi, G., 2005. Standardisation of the measurement of lung volumes. *Eur. Respir. J.*, 26, 511-522. <https://doi.org/10.1183/09031936.05.00035005>
- WBEA, 2020. Ambient Air Monitoring Station Site Documentation - Athabasca Valley. <https://wbea.org/wp-content/uploads/2020/03/Athabasca-Valley-Site-Documentation.pdf> (accessed August 02 2020).
- Weinmann, G.G., Liu, M.C., Proud, D., Weidenbach-Gerbase, M., Hubbard, W., Frank, R., 1995. Ozone exposure in humans: inflammatory, small and peripheral airway responses. *Am. J. Respir. Crit. Care Med.*, 152, 1175-1182. <https://doi.org/10.1164/ajrccm.152.4.7551367>
- Yang, X.Y., Wen, B., Han, F., Wang, C., Zhang, S.P., Wang, J., . . . Wang, Q., 2020. Acute Effects of Individual Exposure to Fine Particulate Matter on Pulmonary Function in Schoolchildren. *Biomed Environ Sci.* 33, 647-659. <https://doi.org/10.3967/bes2020.086>
- Youssef, H., Liousse, C., Roblou, L., Assamoi, E.-M., Salonen, R., Maesano, C., . . . Annesi-Maesano, I., 2014. Non-Accidental Health Impacts of Wildfire Smoke. *Int. J. Environ. Res. Public Health.* 11, 11772-11804. <https://doi.org/10.3390/ijerph11111772>
- Yu, Y., Yu, Z., Sun, P., Lin, B., Li, L., Wang, Z., . . . Guo, S., 2018. Effects of ambient air pollution from municipal solid waste landfill on children's non-specific immunity and respiratory health. *Environ. Pollut.*, 236, 382-390. <https://doi.org/10.1016/j.envpol.2017.12.094>
- Zhang, J., Sun, H., Chen, Q., Gu, J., Ding, Z., Xu, Y., 2019. Effects of individual ozone exposure on lung function in the elderly: a cross-sectional study in China. *Environmental Science and Pollution Research.* 26, 11690-11695. <https://doi.org/10.1007/s11356-019-04324-w>
- Zheng, R., Tao, L., Jian, H., Chang, Y., Cheng, Y., Feng, Y., Zhang, H., 2018. NLRP3 inflammasome activation and lung fibrosis caused by airborne fine particulate matter. *Ecotoxicol. Environ. Saf.*, 163, 612-619. <https://doi.org/10.1016/j.ecoenv.2018.07.076>

**Table 1:** Demographic characteristics, exposure history, and clinical profiles of the RCMP officers

| <b><i>Demographics</i></b>                           | <b>N=218</b>               |
|------------------------------------------------------|----------------------------|
| Sex (male), n (%)                                    | 155 (71)                   |
| Age (years), mean (SD)                               | 38 (9)                     |
| BMI (kg/m <sup>2</sup> ), mean (SD)                  | 29.8 (5.2)                 |
| Ethnicity, n (%)                                     |                            |
| Caucasian                                            | 209 (96)                   |
| Others                                               | 9 (4)                      |
| Never smokers, n (%)                                 | 176 (81)                   |
| Passively smoke exposure at childhood, n (%)         | 131 (60)                   |
| Parental lung disease, n (%)                         | 33 (15)                    |
| Family history of cancer, n (%)                      | 49 (23)                    |
| Personal PPE used while deployed, n (%)              | 147 (68)                   |
| Days spent amid wildfire, median (IQR)               | 8 (7, 10)                  |
| Asthma, n (%)                                        | 65 (30)                    |
| COPD, n (%)                                          | 5 (2)                      |
| <b><i>Personal exposure details</i></b>              |                            |
| CO (µg/m <sup>3</sup> ), median (IQR)                | 17386.8 (11509.3, 25945.0) |
| CH <sub>4</sub> (µg/m <sup>3</sup> ), median (IQR)   | 11063.6 (9680.7, 13413.1)  |
| NO (µg/m <sup>3</sup> ), median (IQR)                | 19.9 (16.9, 28.8)          |
| NO <sub>2</sub> (µg/m <sup>3</sup> ), median (IQR)   | 90.3 (68.8, 140.0)         |
| O <sub>3</sub> (µg/m <sup>3</sup> ), median (IQR)    | 590.8 (446.8, 992.1)       |
| SO <sub>2</sub> (µg/m <sup>3</sup> ), median (IQR)   | 22.6 (14.6, 57.8)          |
| PM <sub>2.5</sub> (µg/m <sup>3</sup> ), median (IQR) | 1632.9 (1014.3, 2142.6)    |
| <b><i>Lung function</i></b>                          |                            |
| FEV <sub>1</sub> (% predicted), mean (SD)            | 96.2 (12.4)                |
| FVC (% predicted), mean (SD)                         | 100.8 (12.3)               |
| FEV <sub>1</sub> /FVC (%), mean (SD)                 | 76.5 (5.9)                 |
| TLC (% predicted), mean (SD)                         | 95.3 (11.1)                |
| RV (% predicted), mean (SD)                          | 80.1 (19.5)                |

---

|                       |            |
|-----------------------|------------|
| RV/TLC (%), mean (SD) | 22.4 (4.8) |
|-----------------------|------------|

---

Data presented as frequency (%), mean (standard deviation: SD), or median (interquartile range: IQR), unless otherwise specified.

Abbreviations: BMI: body mass index; COPD: chronic obstructive pulmonary disease; FEV<sub>1</sub>: forced expiratory volume in 1 second; FVC: forced vital capacity; PPE: personal protective equipment.

## Figure Legends

### **Figure 1: Scatterplot matrix and distribution (histograms) of continuous air pollution indices.**

Bivariate scatterplots of continuous variables below the diagonal; (distribution) histograms of each variable on the diagonal; Spearman's correlation coefficient ( $\rho$ ) above the diagonal. Note: All correlation values are significant at  $p < 0.001$ . Abbreviations: CO: carbon monoxide; CH<sub>4</sub>: methane; NO: nitric oxide; NO<sub>2</sub>: nitrogen dioxide; O<sub>3</sub>: ozone; SO<sub>2</sub>: sulphur dioxide; PM<sub>2.5</sub>: particulate matter  $\leq 2.5\mu\text{m}$  in diameter. All units are in  $\mu\text{g}/\text{m}^3$ .

### **Figure 2: Changes in lung function in association with per interquartile (IQR) change in air pollution index.**

Data presented as linear regression coefficient ( $\beta$ ) and 95% confidence interval, unless otherwise specified. Coefficients were calculated with respect to per IQR change ( $\mu\text{g}/\text{m}^3$ ) of air pollution index (principal component). In adjusted models, age, sex, BMI, race, and smoking history were considered as confounders. For abbreviations, see text.

### **Figure 3: Association between changes in lung function in association with per interquartile (IQR) change in air pollution index stratifying by interval (days between deployment and screening).**

Data presented as linear regression coefficient ( $\beta$ ) and 95% confidence interval, unless otherwise specified. Coefficients were calculated in respect to per IQR change ( $\mu\text{g}/\text{m}^3$ ) of the air pollution index (principal component). In adjusted models, age, sex, BMI, race, and smoking history were considered as confounders. For abbreviations, see text.

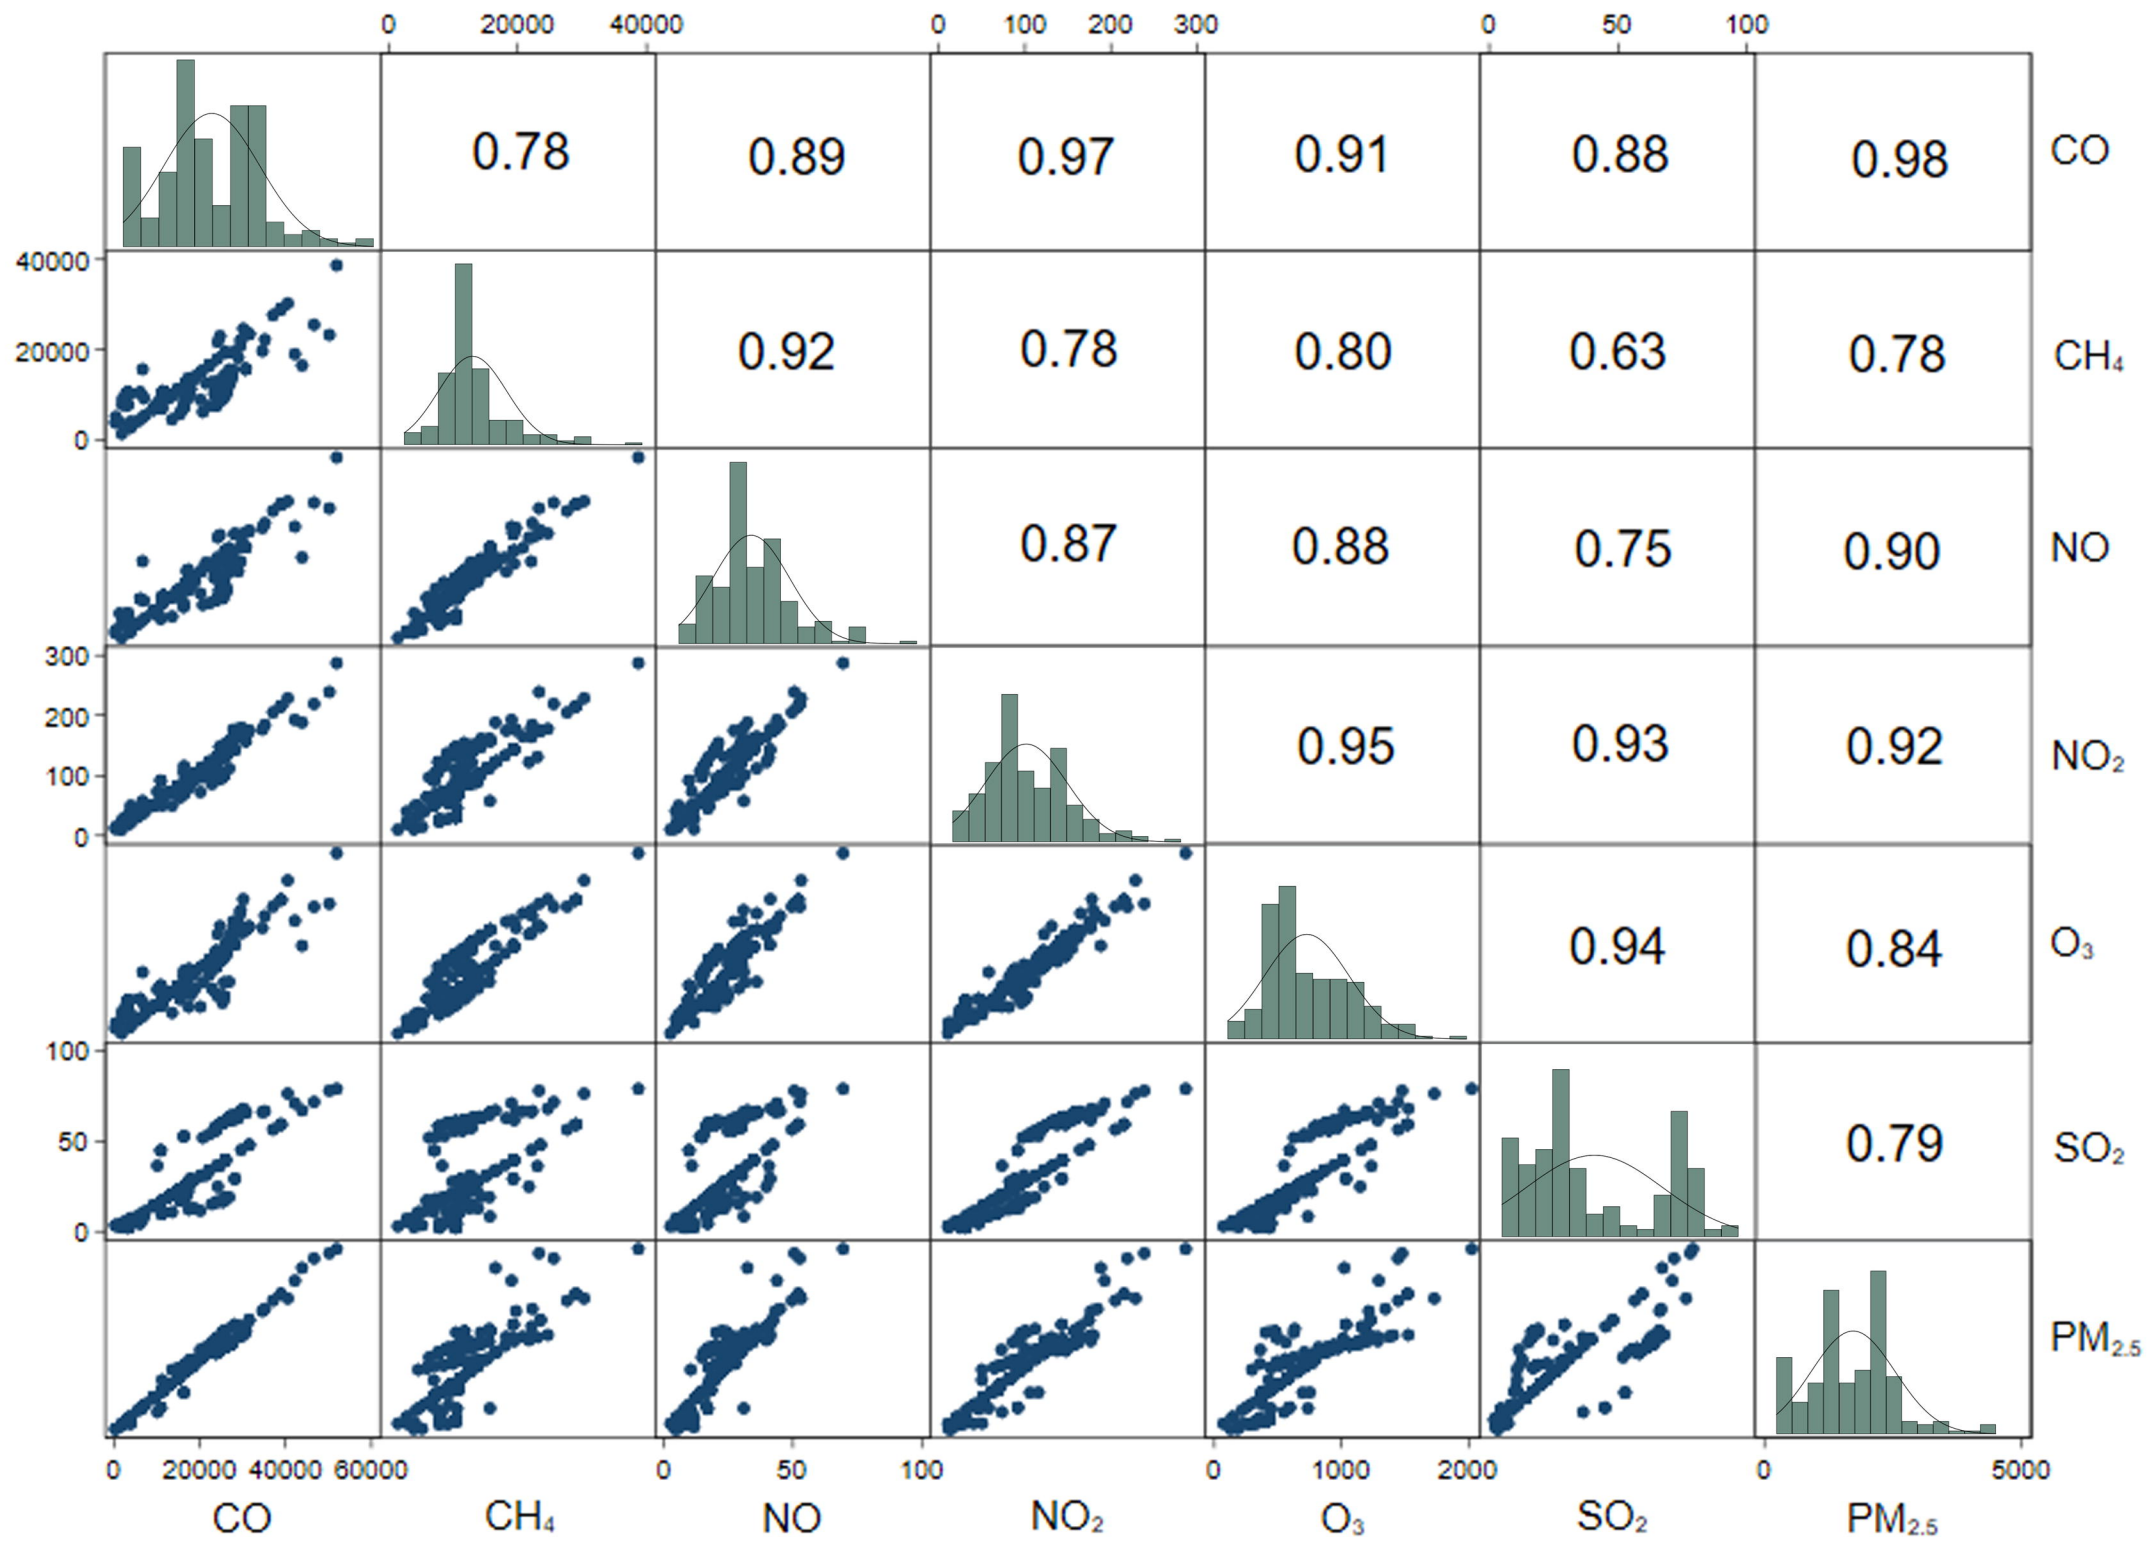

**FVC (% predicted)**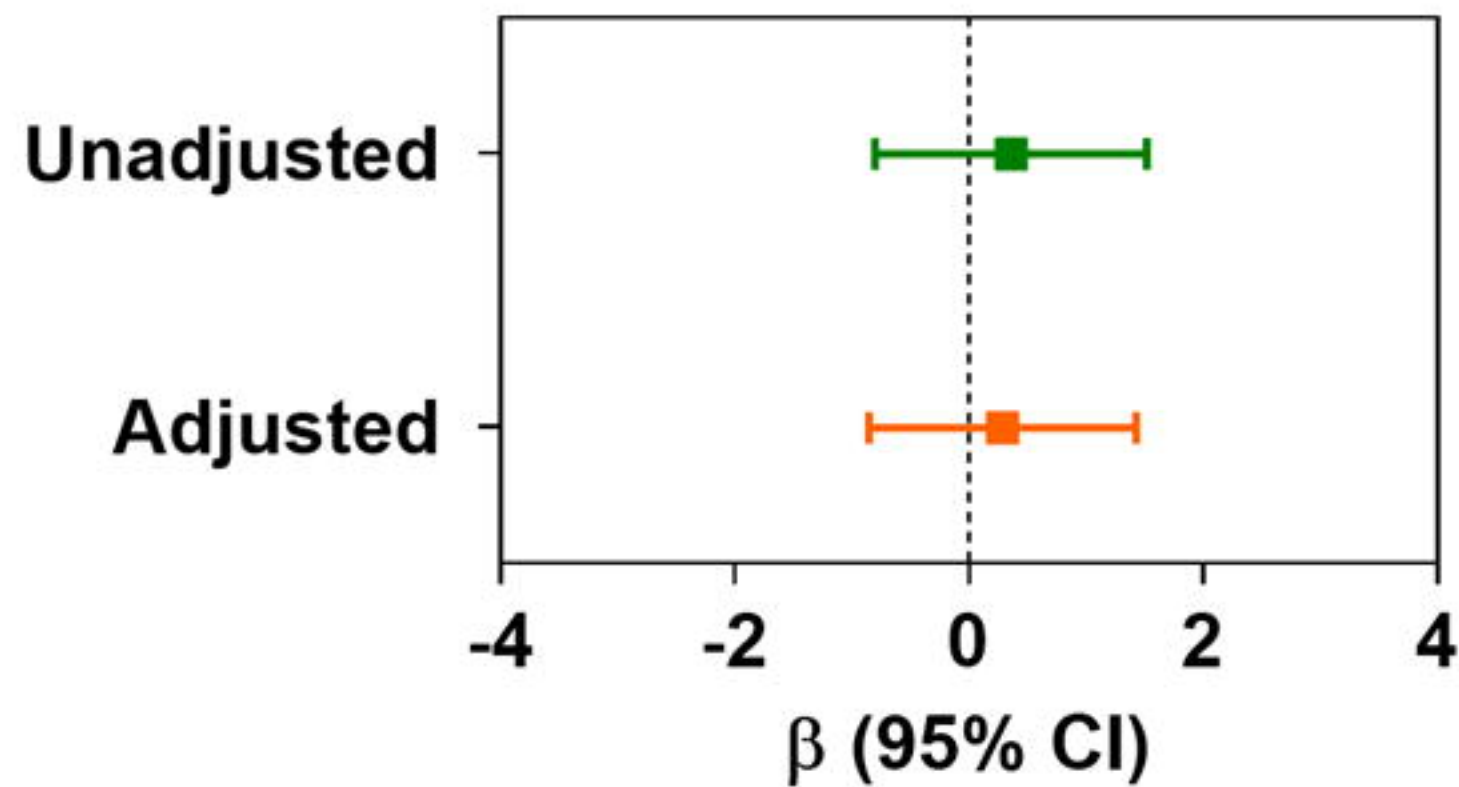**FEV<sub>1</sub> (% predicted)**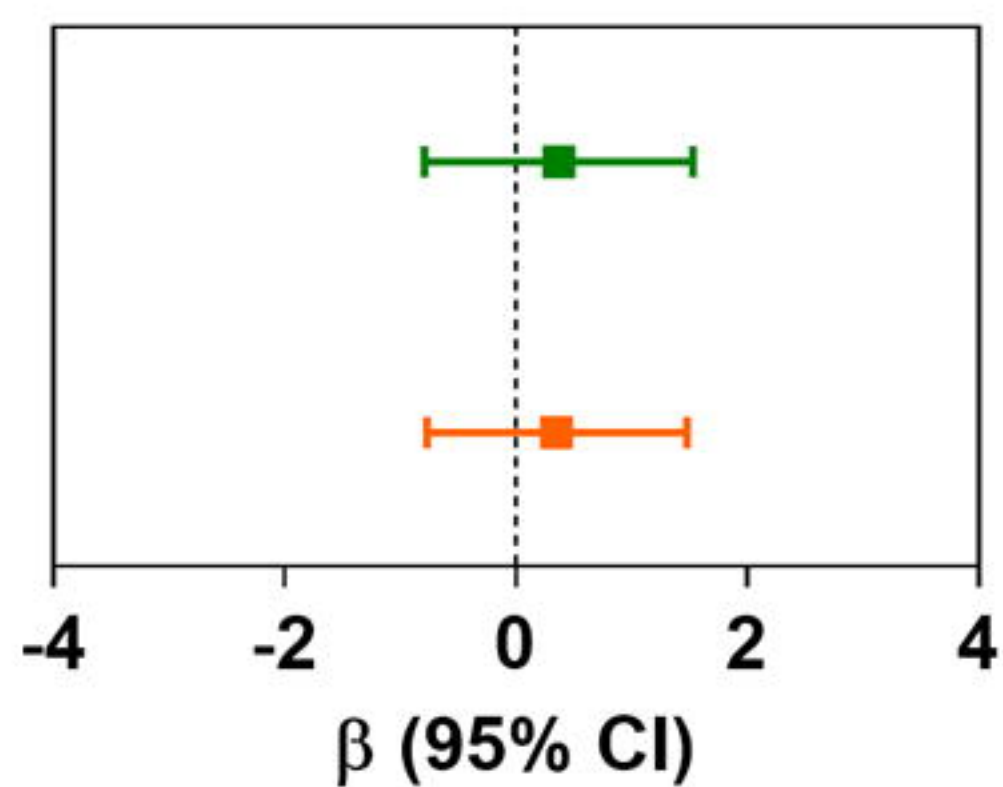**FEV<sub>1</sub>/FVC (%)**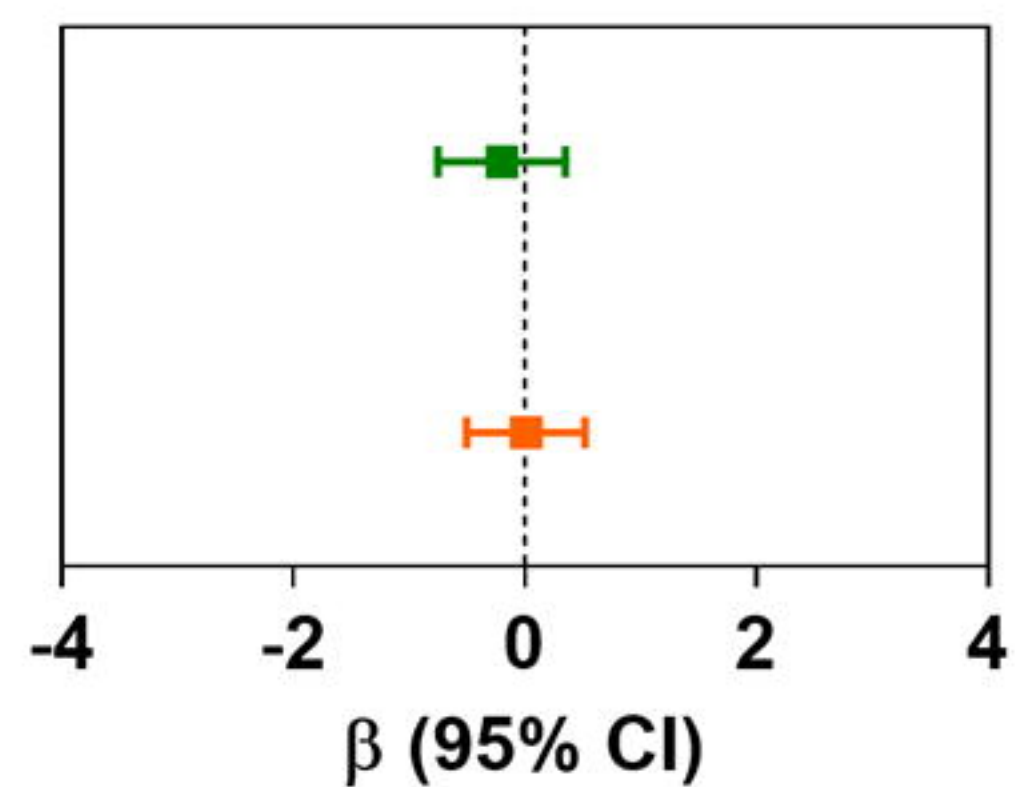**TLC (% predicted)**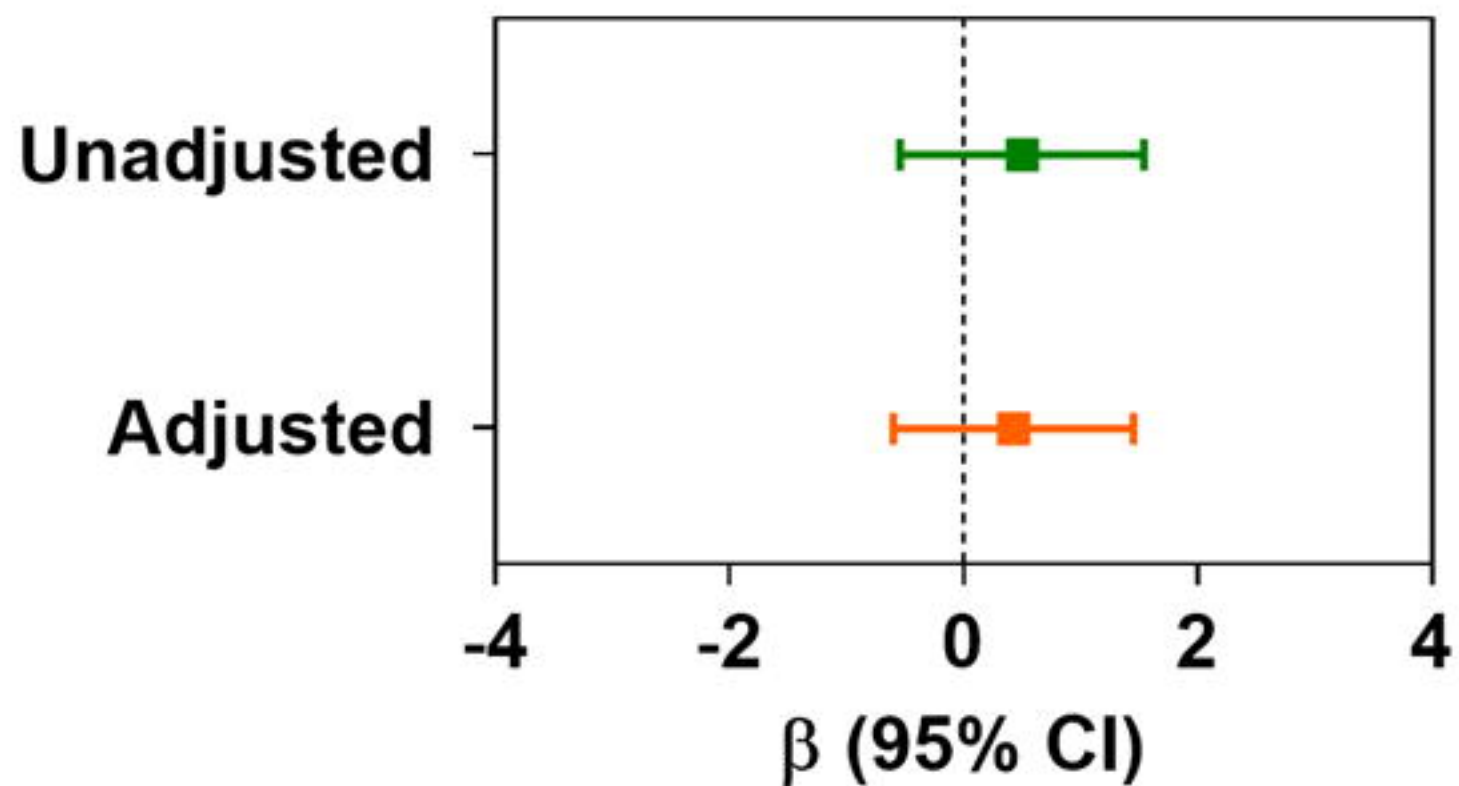**RV (% predicted)**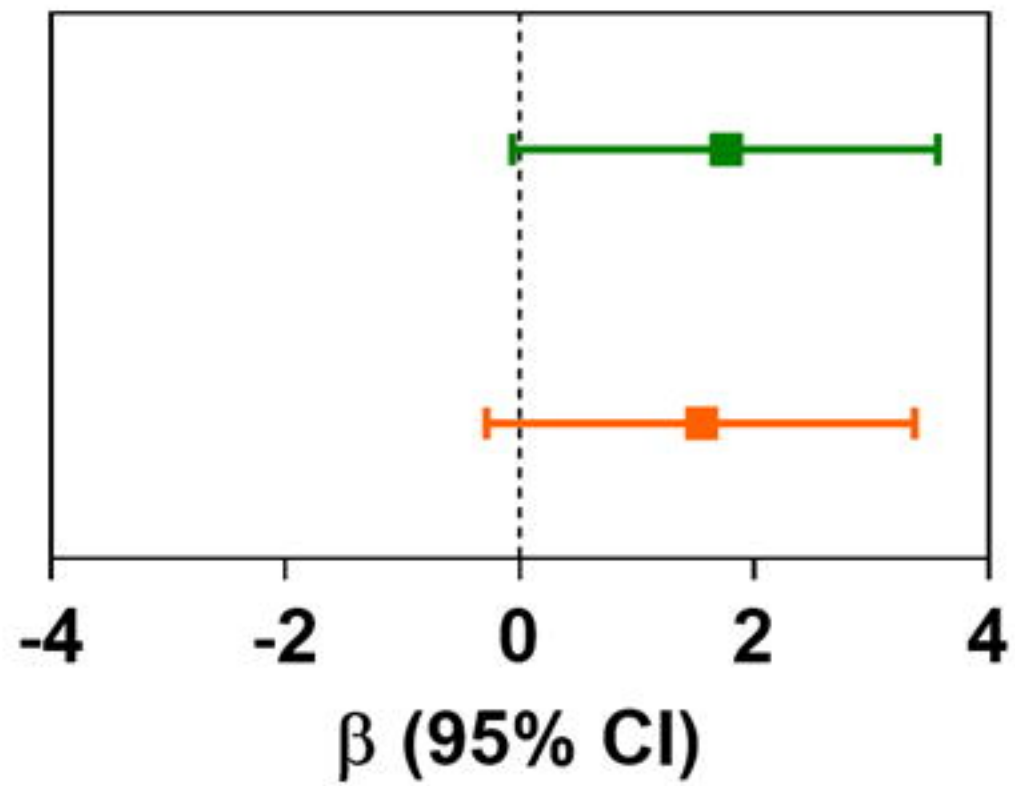**RV/TLC (%)**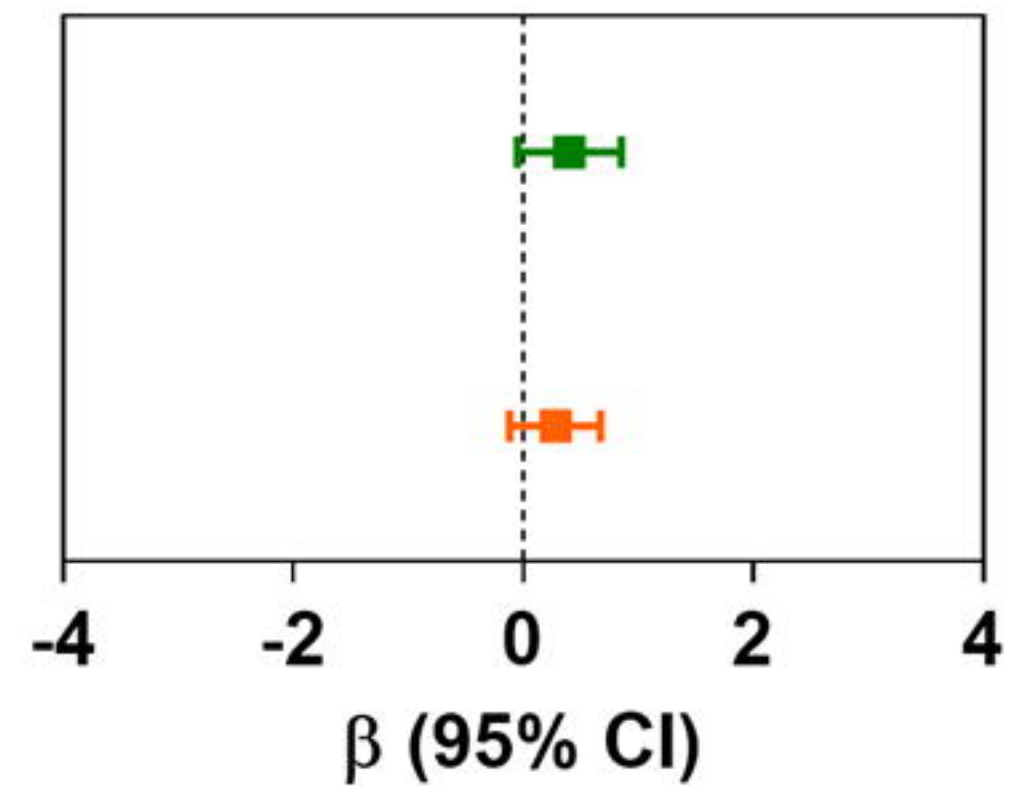



**FVC (% predicted)**

Interval  $\leq$  90 days

Interval  $>$  90 days

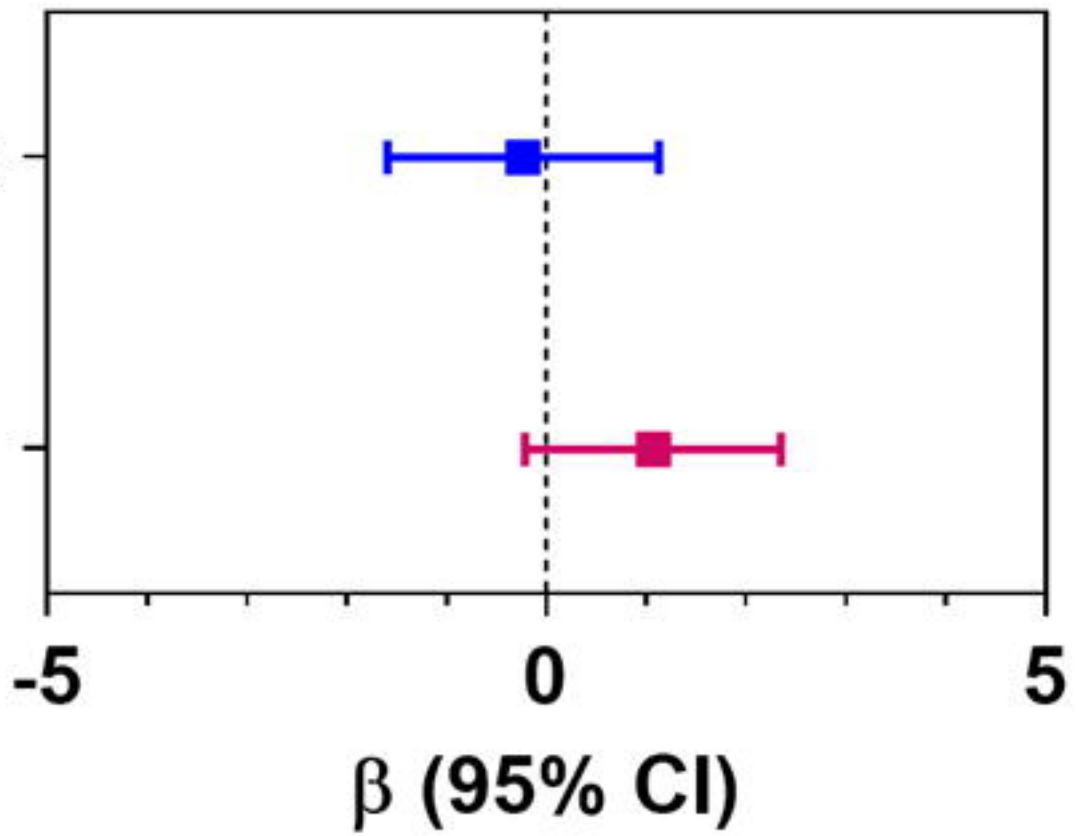

**FEV<sub>1</sub> (% predicted)**

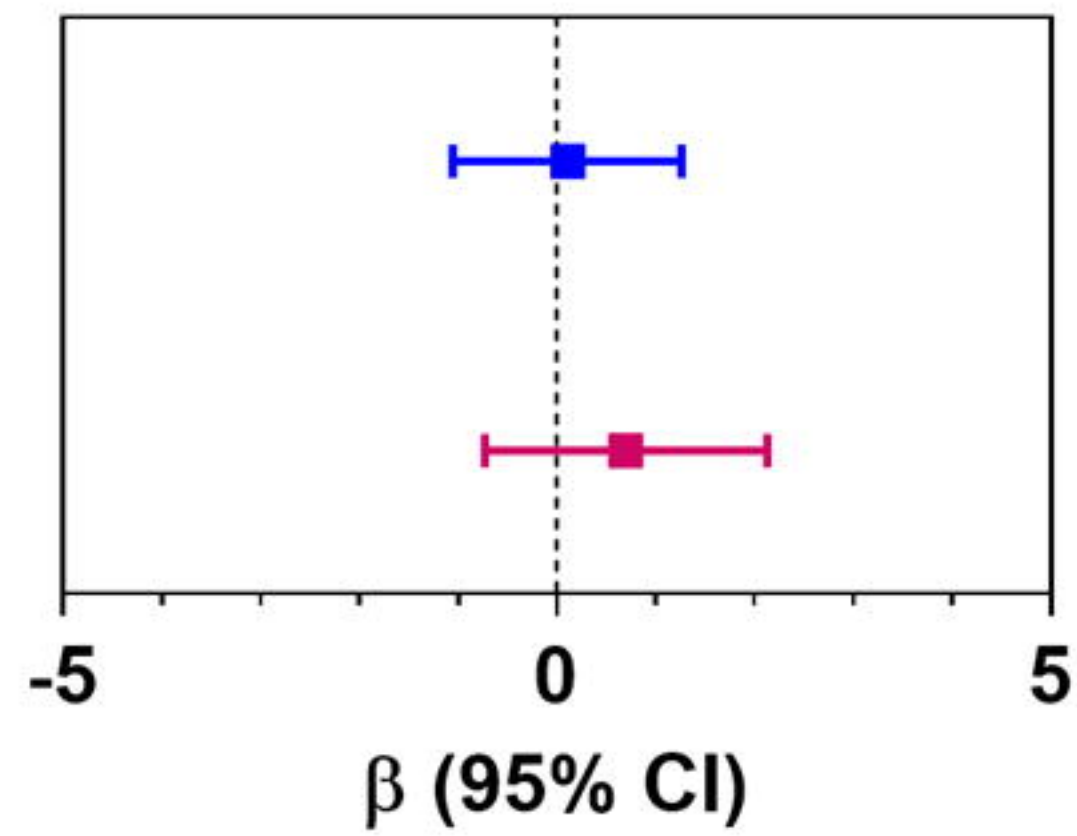

**FEV<sub>1</sub>/FVC (%)**

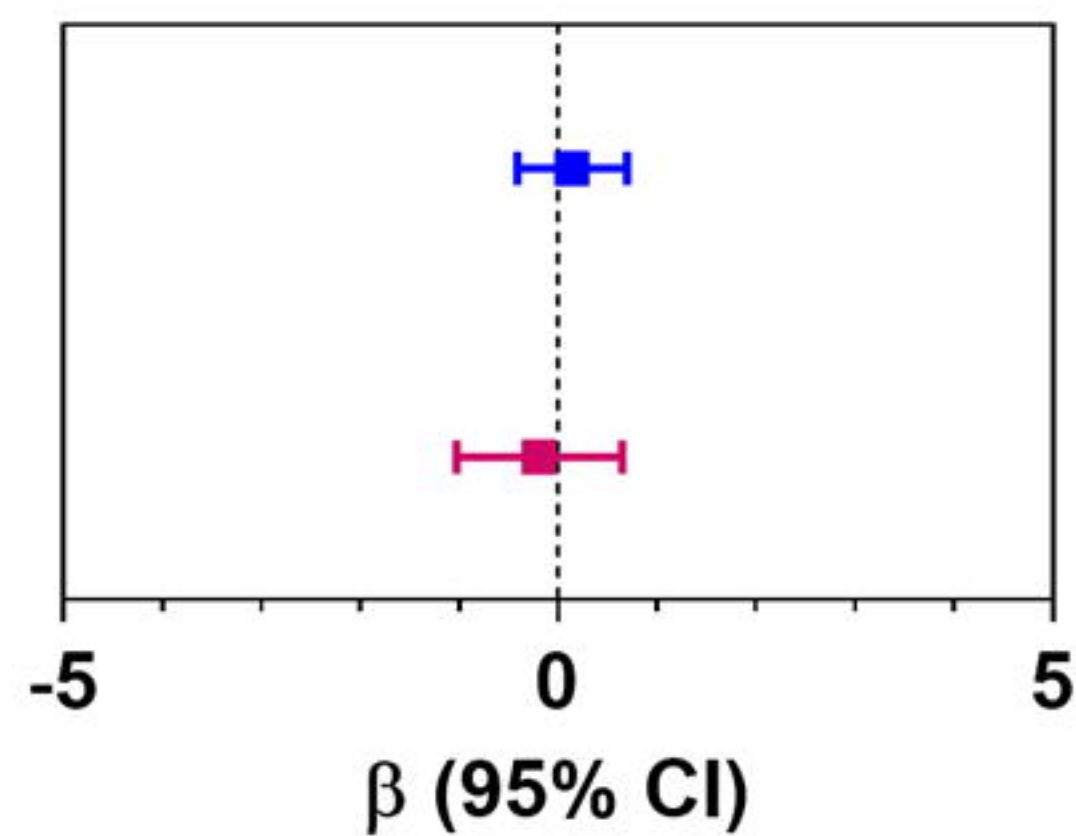

**TLC (% predicted)**

Interval  $\leq$  90 days

Interval  $>$  90 days

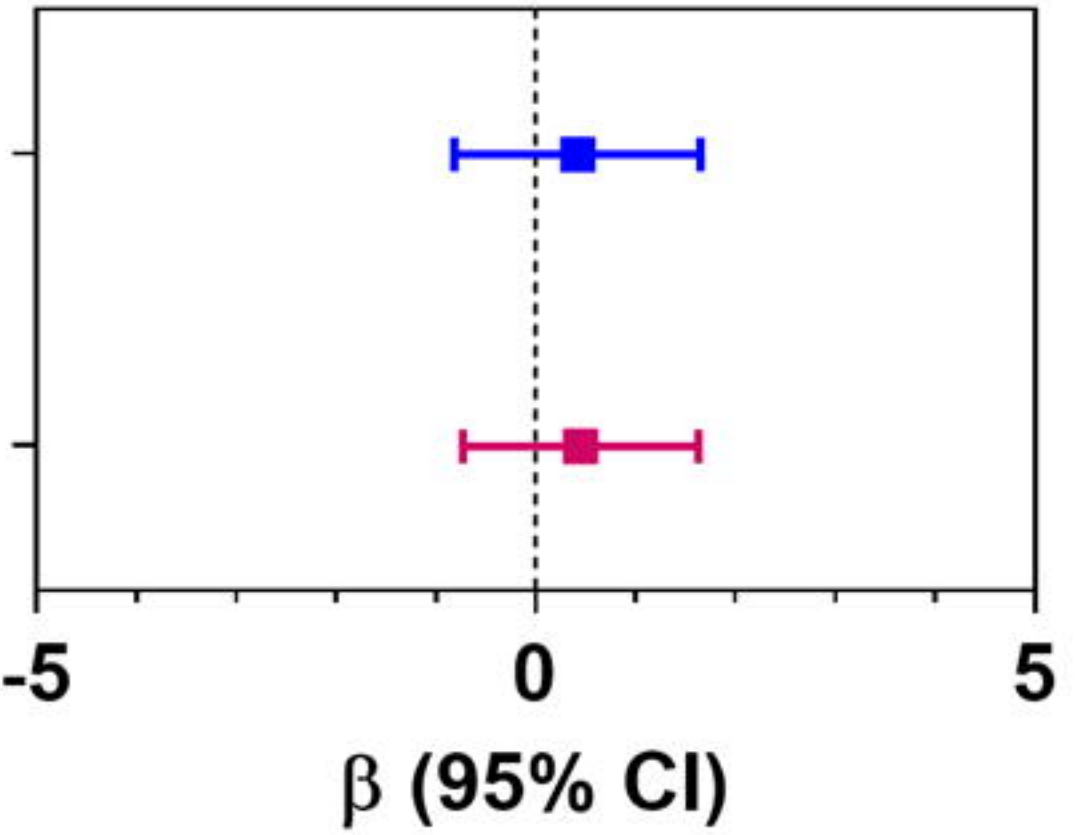

**RV (% predicted)**

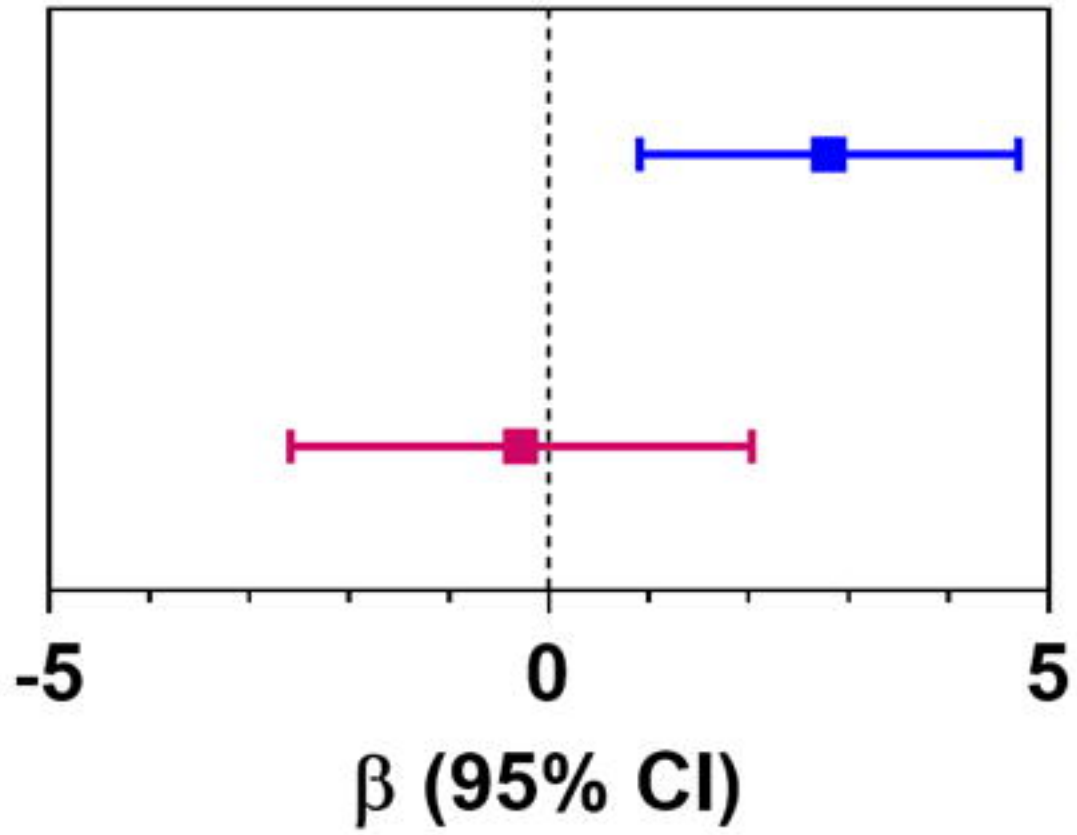

**RV/TLC (%)**

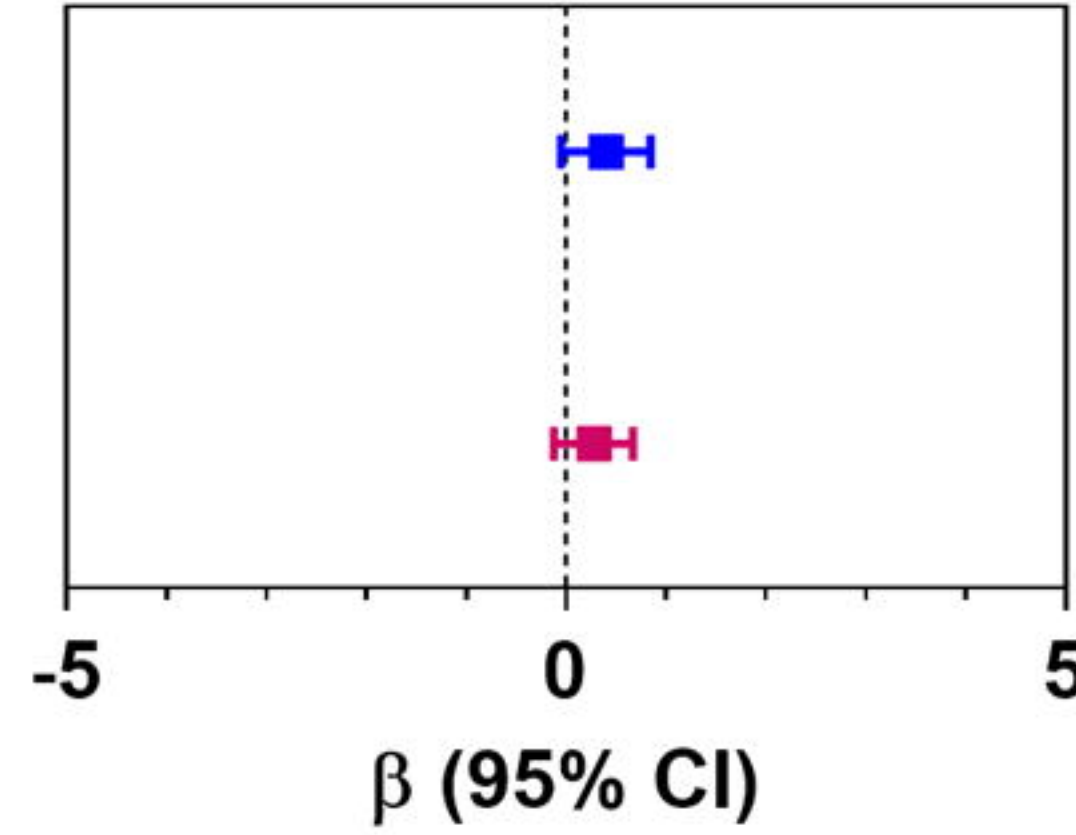

Source: https://medrxiv.org/content/10.1101/2020.12.15.20248289v2.full.pdf
